# Supplementary material for: Identification of prognostic chromatin-remodeling genes in clear cell renal cell carcinoma
Source: publisher site journal article supplement (doi:10.18632/aging.104170), 2020-11-20
Supplement: Supplementary file [file aging-v12i24-104170-supplementary-material-SD2.pdf]

**SUPPLEMENTARY TABLES**

**Supplementary Table 1. Association between Cluster A, Cluster B, clinicopathological parameters and common renal carcinoma genomic mutation characteristics in TCGA-KIRC (n=496).**

|                     | <b>Cluster A (n=206)</b> | <b>Cluster B (n=290)</b> | <b>Total (n=496)</b> | <b>P value</b> |
|---------------------|--------------------------|--------------------------|----------------------|----------------|
| <b>Age</b>          |                          |                          |                      |                |
| Mean±SD             | 61.4 (11.7)              | 59.8 (12.3)              | 60.5 (12.1)          | 0.175          |
| <b>Gender</b>       |                          |                          |                      |                |
| Female              | 67 (32.5%)               | 106 (36.6%)              | 173 (34.9%)          | 0.406          |
| Male                | 139 (67.5%)              | 184 (63.4%)              | 323 (65.1%)          |                |
| <b>Stage</b>        |                          |                          |                      |                |
| I                   | 84 (40.8%)               | 166 (57.2%)              | 250 (50.4%)          | 0.002*         |
| II                  | 22 (10.7%)               | 30 (10.3%)               | 52 (10.5%)           |                |
| III                 | 60 (29.1%)               | 58 (20.0%)               | 118 (23.8%)          |                |
| IV                  | 40 (19.4%)               | 36 (12.4%)               | 76 (15.3%)           |                |
| <b>Grade</b>        |                          |                          |                      |                |
| I-II                | 72 (35.0%)               | 149 (51.4%)              | 221 (44.6%)          | 3e-04*         |
| III-IV              | 131 (63.6%)              | 136 (46.9%)              | 267 (53.8%)          |                |
| <b>VHL status</b>   |                          |                          |                      |                |
| Wild-type           | 62 (35.0%)               | 95 (51.4%)               | 157 (44.6%)          | 0.652          |
| Mutant              | 56 (63.6%)               | 98 (46.9%)               | 154 (53.8%)          |                |
| <b>PBRM1 status</b> |                          |                          |                      |                |
| Wild-type           | 69 (33.5%)               | 108 (37.2%)              | 177 (35.7%)          | 0.751          |
| Mutant              | 49 (23.8%)               | 85 (29.3%)               | 134 (27.0%)          |                |
| <b>TP53 status</b>  |                          |                          |                      |                |
| Wild-type           | 113 (54.9%)              | 191 (65.9%)              | 304 (61.3%)          | 0.146          |
| Mutant              | 5 (2.4%)                 | 2 (0.7%)                 | 7 (1.4%)             |                |
| <b>MTOR status</b>  |                          |                          |                      |                |
| Wild-type           | 107 (51.9%)              | 184 (63.4%)              | 291 (58.7%)          | 0.165          |
| Mutant              | 11 (5.3%)                | 9 (3.1%)                 | 20 (4.0%)            |                |

**Supplementary Table 2. Referenced model accuracy corresponding to the number of variables included in features selection.**

| <b>Variables</b> | <b>Accuracy</b> | <b>Kappa</b> | <b>AccuracySD</b> | <b>KappaSD</b> |
|------------------|-----------------|--------------|-------------------|----------------|
| 2                | 0.885           | 0.76685814   | 0.15621254        | 0.31530365     |
| 3                | 0.90183333      | 0.79766067   | 0.14147878        | 0.28676197     |
| 4                | 0.91633333      | 0.8291625    | 0.11966986        | 0.23714195     |
| 5                | 0.91233333      | 0.81825341   | 0.12669989        | 0.26149403     |
| 6                | 0.927           | 0.85192641   | 0.11011625        | 0.22121793     |
| 7                | 0.95016667      | 0.89943057   | 0.09585972        | 0.19280668     |
| 8                | 0.956           | 0.91039794   | 0.09246348        | 0.1873606      |
| 9                | 0.94566667      | 0.88912754   | 0.09456677        | 0.19169125     |
| 10               | 0.95366667      | 0.9039627    | 0.08562768        | 0.17805629     |
| 11               | 0.9695          | 0.93625874   | 0.07313161        | 0.15326379     |
| 12               | 0.9695          | 0.93695804   | 0.07313161        | 0.15161329     |
| 13               | 0.9655          | 0.92932401   | 0.08186432        | 0.16845566     |
| 14               | 0.967           | 0.93201632   | 0.08140806        | 0.16819983     |
| 15               | 0.969           | 0.93516317   | 0.07970273        | 0.16676898     |
| 16               | 0.9695          | 0.93631702   | 0.07846218        | 0.16410564     |
| 17               | 0.9715          | 0.94086247   | 0.07662548        | 0.15939759     |
| 18               | 0.9735          | 0.94465035   | 0.06906848        | 0.14463067     |
| 19               | 0.9675          | 0.93317016   | 0.08020649        | 0.16558167     |
| 20               | 0.9735          | 0.94395105   | 0.06906848        | 0.14639705     |
| 21               | 0.9715          | 0.93946387   | 0.07662548        | 0.1625547      |
| 22               | 0.9695          | 0.93631702   | 0.07846218        | 0.16410564     |
| 23               | 0.9695          | 0.93631702   | 0.07846218        | 0.16410564     |
| 24               | 0.9695          | 0.93631702   | 0.07846218        | 0.16410564     |
| 25               | 0.96833333      | 0.93337995   | 0.07299509        | 0.15425558     |
| 26               | 0.9735          | 0.94395105   | 0.06906848        | 0.14639705     |
| 27               | 0.9735          | 0.94395105   | 0.06906848        | 0.14639705     |
| 28               | 0.978           | 0.9527972    | 0.06289321        | 0.1354076      |
| 29               | 0.9775          | 0.95164336   | 0.0645008         | 0.13876189     |
| 30               | 0.9755          | 0.9477972    | 0.0668539         | 0.14268294     |
| 31               | 0.978           | 0.9527972    | 0.06289321        | 0.1354076      |

|    |            |            |            |            |
|----|------------|------------|------------|------------|
| 32 | 0.9755     | 0.9477972  | 0.0668539  | 0.14268294 |
| 33 | 0.9735     | 0.94400932 | 0.07468959 | 0.15770879 |
| 34 | 0.974      | 0.94370629 | 0.06759953 | 0.14682918 |
| 35 | 0.978      | 0.9527972  | 0.06289321 | 0.1354076  |
| 36 | 0.96783333 | 0.93228438 | 0.07957008 | 0.16766191 |
| 37 | 0.9715     | 0.93940559 | 0.07115746 | 0.15160319 |
| 38 | 0.97183333 | 0.94061772 | 0.07042022 | 0.14888174 |
| 39 | 0.9755     | 0.9477972  | 0.0668539  | 0.14268294 |
| 40 | 0.974      | 0.94446387 | 0.07333333 | 0.15647684 |
| 41 | 0.978      | 0.9527972  | 0.06289321 | 0.1354076  |
| 42 | 0.9755     | 0.94785548 | 0.07264658 | 0.1542658  |
| 43 | 0.974      | 0.94440559 | 0.06759953 | 0.14506925 |
| 44 | 0.9755     | 0.9477972  | 0.0668539  | 0.14268294 |
| 45 | 0.976      | 0.94895105 | 0.06531973 | 0.13945516 |
| 46 | 0.978      | 0.9534965  | 0.06289321 | 0.13344907 |
| 47 | 0.976      | 0.94895105 | 0.06531973 | 0.13945516 |
| 48 | 0.974      | 0.94370629 | 0.06759953 | 0.14682918 |
| 49 | 0.976      | 0.94900932 | 0.07123726 | 0.1512849  |
| 50 | 0.976      | 0.94825175 | 0.06531973 | 0.14130776 |
| 51 | 0.972      | 0.93991841 | 0.07531751 | 0.16137269 |
| 52 | 0.9715     | 0.93870629 | 0.07115746 | 0.15326508 |
| 53 | 0.9735     | 0.94325175 | 0.06906848 | 0.14813903 |
| 54 | 0.9715     | 0.93940559 | 0.07115746 | 0.15160319 |
| 55 | 0.9675     | 0.93037296 | 0.08020649 | 0.1714723  |
| 56 | 0.9735     | 0.94325175 | 0.06906848 | 0.14813903 |
| 57 | 0.976      | 0.94825175 | 0.06531973 | 0.14130776 |
| 58 | 0.972      | 0.93916084 | 0.06974702 | 0.15201314 |
| 59 | 0.978      | 0.9527972  | 0.06289321 | 0.1354076  |
| 60 | 0.9715     | 0.93800699 | 0.07115746 | 0.15490595 |
| 61 | 0.9695     | 0.93416084 | 0.07313161 | 0.15809319 |
| 62 | 0.9735     | 0.94400932 | 0.07468959 | 0.15770879 |
| 63 | 0.976      | 0.94900932 | 0.07123726 | 0.1512849  |
| 64 | 0.978      | 0.9527972  | 0.06289321 | 0.1354076  |
| 65 | 0.9775     | 0.95234266 | 0.0645008  | 0.13685734 |
| 66 | 0.974      | 0.94370629 | 0.06759953 | 0.14682918 |
| 67 | 0.976      | 0.94895105 | 0.06531973 | 0.13945516 |
| 68 | 0.976      | 0.94825175 | 0.06531973 | 0.14130776 |
| 69 | 0.9675     | 0.92961538 | 0.075      | 0.16264989 |
| 70 | 0.976      | 0.94755245 | 0.06531973 | 0.14313293 |
| 71 | 0.98       | 0.95664336 | 0.06030227 | 0.13112135 |
| 72 | 0.9715     | 0.93870629 | 0.07115746 | 0.15326508 |
| 73 | 0.976      | 0.94825175 | 0.06531973 | 0.14130776 |
| 74 | 0.978      | 0.95285548 | 0.0690191  | 0.14756065 |
| 75 | 0.98       | 0.95664336 | 0.06030227 | 0.13112135 |
| 76 | 0.976      | 0.94755245 | 0.06531973 | 0.14313293 |
| 77 | 0.974      | 0.94376457 | 0.07333333 | 0.1581101  |
| 78 | 0.976      | 0.94825175 | 0.06531973 | 0.14130776 |
| 79 | 0.974      | 0.94446387 | 0.07333333 | 0.15647684 |
| 80 | 0.9715     | 0.93870629 | 0.07115746 | 0.15326508 |
| 81 | 0.98       | 0.95734266 | 0.06030227 | 0.12907677 |
| 82 | 0.978      | 0.9520979  | 0.06289321 | 0.1373346  |
| 83 | 0.98       | 0.95664336 | 0.06030227 | 0.13112135 |
| 84 | 0.9755     | 0.9470979  | 0.0668539  | 0.14448852 |
| 85 | 0.9755     | 0.9477972  | 0.0668539  | 0.14268294 |
| 86 | 0.9675     | 0.93037296 | 0.08020649 | 0.1714723  |
| 87 | 0.976      | 0.94825175 | 0.06531973 | 0.14130776 |

**Supplementary Table 3. Order of the 38 variables to be included according to the highest accuracy of the model.**

| Variable order | Selected genes |
|----------------|----------------|
| 1              | CNOT1          |
| 2              | SIN3A          |
| 3              | BPTF           |
| 4              | CHD8           |
| 5              | CHD9           |
| 6              | DEK            |
| 7              | SIRT6          |
| 8              | SAP30L         |
| 9              | C6orf89        |
| 10             | SUPT16H        |
| 11             | SMARCA5        |
| 12             | CHD6           |
| 13             | RBBP5          |
| 14             | SMARCA2        |
| 15             | CNOT6L         |
| 16             | CNOT8          |
| 17             | CNOT6          |
| 18             | BAZ1B          |
| 19             | CHD4           |
| 20             | BRMS1          |
| 21             | ACTR8          |
| 22             | INO80B         |
| 23             | BRD3           |
| 24             | CNOT7          |
| 25             | PHF8           |
| 26             | CBX5           |
| 27             | RUVBL2         |
| 28             | TOP1           |
| 29             | ACTR6          |
| 30             | MORF4L1        |
| 31             | CHD1           |
| 32             | ANP32E         |
| 33             | INO80E         |
| 34             | ACTB           |
| 35             | BRD7           |
| 36             | PABPC1L        |
| 37             | SMARCD3        |
| 38             | UTY            |
| 39             | PIH1D1         |
| 40             | DPF2           |
| 41             | BRD1           |
| 42             | CAMK2D         |
| 43             | MIER2          |

|    |          |
|----|----------|
| 44 | ACTR5    |
| 45 | PHF1     |
| 46 | SS18     |
| 47 | CNOT3    |
| 48 | DAXX     |
| 49 | BRD8     |
| 50 | SAP30BP  |
| 51 | CHD3     |
| 52 | WDR77    |
| 53 | SUPT20H  |
| 54 | BAZ1A    |
| 55 | WDR61    |
| 56 | NUDT5    |
| 57 | RBBP7    |
| 58 | SAP18    |
| 59 | LRRK2    |
| 60 | INO80C   |
| 61 | ACTN4    |
| 62 | ANP32B   |
| 63 | SIRT2    |
| 64 | CNOT9    |
| 65 | SMARCB1  |
| 66 | HIST1H1C |
| 67 | PHF21A   |
| 68 | RBBP8    |
| 69 | SMYD2    |
| 70 | SS18L1   |
| 71 | SUPT5H   |

**Supplementary Table 4. TCGA pan-cancer survival analysis of BPTF, CNOT1 and SIN3A.**

|              |           | <b>BLCA</b> | <b>BRCA</b> | <b>CESC</b> | <b>CHOL</b> | <b>COAD</b> | <b>ESCA</b> | <b>GBM</b>  |
|--------------|-----------|-------------|-------------|-------------|-------------|-------------|-------------|-------------|
| <b>BPTF</b>  | HR (high) | 0.86        | 1.1         | 1.2         | 0.38        | 0.96        | 1.2         | 0.78        |
|              | Logrank p | 0.32        | 0.51        | 0.42        | 0.049       | 0.86        | 0.54        | 0.17        |
| <b>SIN3A</b> | HR (high) | 1           | 1           | 0.85        | 0.58        | 1.2         | 0.86        | 0.99        |
|              | Logrank p | 0.9         | 0.98        | 0.48        | 0.27        | 0.55        | 0.51        | 0.95        |
| <b>CNOT1</b> | HR (high) | 1           | 1.1         | 0.86        | 0.8         | 0.67        | 1.7         | 0.92        |
|              | Logrank p | 0.86        | 0.42        | 0.53        | 0.64        | 0.11        | 0.03*       | 0.65        |
|              |           | <b>HNSC</b> | <b>KIHC</b> | <b>KIRP</b> | <b>LAML</b> | <b>LIHC</b> | <b>LUAD</b> | <b>LUSC</b> |
| <b>BPTF</b>  | HR (high) | 0.93        | 3.8         | 0.92        | 1.1         | 1.4         | 1.4         | 1.1         |
|              | Logrank p | 0.62        | 0.075       | 0.78        | 0.84        | 0.065       | 0.025*      | 0.36        |
| <b>SIN3A</b> | HR (high) | 1           | 3.6         | 1.4         | 1.2         | 1.1         | 1.1         | 1.1         |
|              | Logrank p | 0.93        | 0.087       | 0.32        | 0.5         | 0.6         | 0.67        | 0.71        |
| <b>CNOT1</b> | HR (high) | 1.1         | 0.45        | 0.85        | 1.4         | 1.3         | 1.3         | 1.1         |
|              | Logrank p | 0.7         | 0.24        | 0.6         | 0.19        | 0.17        | 0.12        | 0.47        |
|              |           | <b>OV</b>   | <b>PAAD</b> | <b>PRAD</b> | <b>READ</b> | <b>STAD</b> | <b>THCA</b> | <b>UCEC</b> |
| <b>BPTF</b>  | HR (high) | 1.1         | 0.76        | 1.3         | 0.51        | 1.1         | 2.3         | 1.1         |
|              | Logrank p | 0.59        | 0.19        | 0.72        | 0.17        | 0.7         | 0.12        | 0.84        |
| <b>SIN3A</b> | HR (high) | 0.94        | 1.3         | 0.79        | 0.6         | 1.2         | 1.7         | 1.2         |
|              | Logrank p | 0.59        | 0.26        | 0.72        | 0.28        | 0.33        | 0.3         | 0.59        |
| <b>CNOT1</b> | HR (high) | 0.95        | 1.1         | 1.8         | 0.53        | 1.3         | 1.8         | 0.98        |
|              | Logrank p | 0.67        | 0.53        | 0.35        | 0.19        | 0.083       | 0.26        | 0.96        |
